# Supplementary material for: The effect of calcium propionate on the ruminal bacterial community composition in finishing bulls
Source: PubMed Central journal article supplement — Asian-Australas J Anim Sci. 2016 Sep 16;30(4):495–504. doi: 10.5713/ajas.16.0469 (PMC5394835; doi:10.5713/ajas.16.0469), 2016-09-16
Supplement: ajas-30-4-495-supplementary.pdf [file ajas-30-4-495-supplementary.pdf]

Table s1. Individual finishing bulls for unique OTUs, richness estimates, and diversity indices within the rumen.

| SampleID | SeqsNum | OTUsNum | EvenSeqsNum | EvenOTUsNum | ACE      | simpson | shannon | PD_whole_tree | chao1    | observed_species | goods_coverage |
|----------|---------|---------|-------------|-------------|----------|---------|---------|---------------|----------|------------------|----------------|
| CONT1    | 49092   | 10291   | 12000       | 4160        | 12592.09 | 0.9965  | 10.3555 | 414.95        | 11187.83 | 4160             | 97.16          |
| CONT2    | 37943   | 9066    | 12000       | 4262        | 13895.34 | 0.9962  | 10.3658 | 432.45        | 12190.98 | 4262             | 94.87          |
| CONT3    | 31995   | 7743    | 12000       | 4114        | 12046.21 | 0.9943  | 10.1540 | 420.32        | 10607.84 | 4114             | 93.75          |
| CONT4    | 19662   | 6239    | 12000       | 4512        | 12468.61 | 0.9969  | 10.6381 | 450.95        | 11083.55 | 4512             | 90.83          |
| PROP1    | 13606   | 4107    | 12000       | 3774        | 9758.77  | 0.9762  | 9.4446  | 392.93        | 8195.37  | 3774             | 90.47          |
| PROP2    | 13888   | 5216    | 12000       | 4704        | 15048.01 | 0.9959  | 10.5528 | 457.64        | 12843.53 | 4704             | 86.88          |
| PROP3    | 15556   | 5310    | 12000       | 4475        | 12033.90 | 0.9972  | 10.6386 | 457.10        | 10655.86 | 4475             | 91.20          |
| PROP4    | 12942   | 4901    | 12000       | 4662        | 12968.54 | 0.9953  | 10.6077 | 479.80        | 11255.42 | 4662             | 88.14          |

Table s2. Percent abundance of phylum in individual ruminal samples (%).

| Taxon              | CONT1   | CONT2   | CONT3   | CONT4   | PROP1   | PROP2   | PROP3   | PROP4   |
|--------------------|---------|---------|---------|---------|---------|---------|---------|---------|
| p__Firmicutes      | 49.2000 | 62.9000 | 59.6500 | 56.6833 | 74.1917 | 60.1500 | 59.5667 | 63.0583 |
| p__Bacteroidetes   | 33.5083 | 14.9000 | 27.0917 | 25.4083 | 15.2250 | 24.6000 | 28.2583 | 20.3333 |
| p__Tenericutes     | 8.1917  | 5.6833  | 5.2417  | 7.0417  | 3.0250  | 4.6750  | 2.5833  | 3.1833  |
| p__TM7             | 3.8500  | 5.9917  | 2.7500  | 4.4833  | 1.9833  | 3.4167  | 2.8083  | 1.8750  |
| Unknown            | 3.0500  | 3.3417  | 3.5750  | 3.8833  | 3.8083  | 3.3250  | 3.5750  | 4.9667  |
| p__Verrucomicrobia | 0.6833  | 3.4250  | 0.4250  | 0.4500  | 0.1667  | 0.6250  | 0.5333  | 0.5250  |
| p__Proteobacteria  | 0.5417  | 1.1167  | 0.3500  | 0.6167  | 0.6333  | 0.8167  | 0.4667  | 1.8583  |
| p__Actinobacteria  | 0.4250  | 1.1000  | 0.4333  | 0.4750  | 0.4500  | 0.6833  | 1.1417  | 3.0083  |
| p__SR1             | 0.1667  | 0.0417  | 0.0667  | 0.0417  | 0.0750  | 0.0750  | 0.0667  | 0.0833  |
| p__Chloroflexi     | 0.1333  | 0.2333  | 0.1167  | 0.1583  | 0.0833  | 0.2667  | 0.1417  | 0.2000  |
| p__Cyanobacteria   | 0.1083  | 0.1667  | 0.0917  | 0.0750  | 0.0667  | 0.0667  | 0.0250  | 0.1000  |
| p__[Thermi]        | 0.0500  | 0.0500  | 0.0500  | 0.1000  | 0.0667  | 0.0417  | 0.0333  | 0.1000  |
| p__Planctomycetes  | 0.0250  | 0.0167  | 0.0083  | 0.2417  | 0.0167  | 1.0667  | 0.0250  | 0.0917  |
| p__Euryarchaeota   | 0.0167  | 0.9917  | 0.1000  | 0.2750  | 0.1417  | 0.0750  | 0.7333  | 0.5583  |
| p__Spirochaetes    | 0.0167  | 0.0083  | 0.0250  | 0.0250  | 0.0167  | 0.0417  | 0.0250  | 0.0250  |
| p__WPS-2           | 0.0167  | 0.0083  | 0.0083  | 0.0083  | 0.0167  | 0.0083  | 0.0000  | 0.0000  |
| p__Elusimicrobia   | 0.0083  | 0.0000  | 0.0000  | 0.0000  | 0.0000  | 0.0000  | 0.0000  | 0.0000  |
| p__Fibrobacteres   | 0.0083  | 0.0167  | 0.0167  | 0.0000  | 0.0083  | 0.0083  | 0.0167  | 0.0000  |
| p__Lentisphaerae   | 0.0000  | 0.0083  | 0.0000  | 0.0083  | 0.0000  | 0.0333  | 0.0000  | 0.0083  |
| p__Synergistetes   | 0.0000  | 0.0000  | 0.0000  | 0.0250  | 0.0250  | 0.0250  | 0.0000  | 0.0250  |

Table s3. Percent abundance of dominant genus in individual ruminal samples (%).

| Taxon                 | CONT1   | CONT2   | CONT3   | CONT4   | PROP1   | PROP2   | PROP3   | PROP4   |
|-----------------------|---------|---------|---------|---------|---------|---------|---------|---------|
| Unknown               | 78.4667 | 71.6083 | 66.9083 | 74.1000 | 85.8500 | 73.6000 | 80.1750 | 67.5917 |
| g__Succiniclasticum   | 7.0583  | 10.6417 | 16.0333 | 11.6750 | 2.0333  | 11.5417 | 3.8917  | 12.6000 |
| g__Butyrivibrio       | 3.5500  | 3.5583  | 5.3000  | 3.3583  | 3.5417  | 2.5583  | 4.2167  | 3.8333  |
| g__Ruminococcus       | 2.5750  | 4.1583  | 4.4667  | 2.2167  | 2.5833  | 2.3083  | 3.2833  | 6.0583  |
| g__Prevotella         | 3.5833  | 2.0667  | 2.3167  | 2.8500  | 2.1250  | 3.5417  | 2.8917  | 3.4917  |
| g__p-75-a5            | 0.6167  | 1.4250  | 1.0167  | 0.5417  | 0.2333  | 0.7833  | 0.4917  | 0.3500  |
| g__Anaerostipes       | 1.2250  | 0.0917  | 0.9917  | 0.7083  | 0.4250  | 0.5333  | 0.3750  | 0.1250  |
| g__Coprococcus        | 0.2500  | 0.2833  | 0.3833  | 0.5167  | 0.4583  | 0.4250  | 0.3333  | 0.2917  |
| g__Mogibacterium      | 0.3250  | 1.4833  | 0.3583  | 0.4417  | 0.1083  | 0.7667  | 0.6833  | 0.6000  |
| g__Anaerovibrio       | 0.3250  | 0.5417  | 0.2417  | 0.5917  | 0.1750  | 0.7583  | 0.2000  | 0.3917  |
| g__YRC22              | 0.2250  | 0.1250  | 0.1583  | 0.1917  | 0.2667  | 0.2917  | 0.2417  | 0.3500  |
| g__L7A_E11            | 0.1583  | 0.3250  | 0.1583  | 0.1500  | 0.1750  | 0.2000  | 0.2083  | 0.1250  |
| g__[Ruminococcus]     | 0.1083  | 0.0500  | 0.1583  | 0.1000  | 0.0500  | 0.1333  | 0.0750  | 0.0750  |
| g__SHD-231            | 0.1333  | 0.2333  | 0.1167  | 0.1583  | 0.0833  | 0.2667  | 0.1417  | 0.2000  |
| g__Clostridium        | 0.0750  | 0.0583  | 0.1167  | 0.1500  | 0.1250  | 0.1417  | 0.1250  | 0.1833  |
| g__CF231              | 0.1667  | 0.1500  | 0.1000  | 0.1583  | 0.1167  | 0.3917  | 0.2083  | 0.2667  |
| g__Oscillospira       | 0.2583  | 0.0917  | 0.1000  | 0.5250  | 0.1417  | 0.2167  | 0.0750  | 0.1250  |
| g__Bifidobacterium    | 0.0000  | 0.6417  | 0.0917  | 0.0333  | 0.1083  | 0.1333  | 0.4417  | 1.1667  |
| g__Methanobrevibacter | 0.0167  | 0.9833  | 0.0917  | 0.2667  | 0.1417  | 0.0750  | 0.7333  | 0.5583  |
| g__Bulleidia          | 0.0667  | 0.1667  | 0.0917  | 0.0667  | 0.2667  | 0.1500  | 0.1667  | 0.1333  |
| g__Moryella           | 0.0417  | 0.0083  | 0.0917  | 0.0250  | 0.1000  | 0.0250  | 0.0583  | 0.0250  |
| g__Blautia            | 0.1333  | 0.1917  | 0.0750  | 0.1417  | 0.2083  | 0.0750  | 0.1750  | 0.0833  |
| g__Selenomonas        | 0.0167  | 0.0167  | 0.0667  | 0.1250  | 0.0417  | 0.1167  | 0.0500  | 0.1583  |
| g__Desulfovibrio      | 0.1083  | 0.0417  | 0.0667  | 0.0833  | 0.0167  | 0.0417  | 0.0333  | 0.0917  |
| g__Atopobium          | 0.0083  | 0.0417  | 0.0667  | 0.0583  | 0.0250  | 0.0500  | 0.0833  | 0.0417  |
| g__Shuttleworthia     | 0.0250  | 0.1917  | 0.0583  | 0.1167  | 0.0583  | 0.0250  | 0.0667  | 0.0583  |
| g__Deinococcus        | 0.0500  | 0.0500  | 0.0500  | 0.1000  | 0.0667  | 0.0417  | 0.0333  | 0.1000  |
| g__Lactobacillus      | 0.0417  | 0.0417  | 0.0417  | 0.0500  | 0.0000  | 0.0000  | 0.0083  | 0.0000  |
| g__Dorea              | 0.0250  | 0.1000  | 0.0333  | 0.0083  | 0.0083  | 0.0167  | 0.0917  | 0.0333  |
| g__Bacteroides        | 0.0167  | 0.0333  | 0.0333  | 0.0167  | 0.0167  | 0.0250  | 0.0167  | 0.0250  |
| g__BF311              | 0.0750  | 0.0167  | 0.0250  | 0.0583  | 0.0250  | 0.0917  | 0.0500  | 0.1000  |
| g__RFN20              | 0.0167  | 0.0750  | 0.0250  | 0.0500  | 0.0250  | 0.1583  | 0.0667  | 0.0583  |
| g__Corynebacterium    | 0.0083  | 0.0083  | 0.0250  | 0.0083  | 0.0083  | 0.0083  | 0.0167  | 0.0167  |
| g__Dehalobacterium    | 0.0750  | 0.1500  | 0.0167  | 0.1250  | 0.0583  | 0.2083  | 0.0833  | 0.0833  |
| g__Sphaerochaeta      | 0.0083  | 0.0000  | 0.0167  | 0.0167  | 0.0083  | 0.0333  | 0.0000  | 0.0167  |
| g__Fibrobacter        | 0.0083  | 0.0167  | 0.0167  | 0.0000  | 0.0083  | 0.0083  | 0.0167  | 0.0000  |
| g__Dechloromonas      | 0.0083  | 0.1000  | 0.0083  | 0.0250  | 0.0000  | 0.0583  | 0.0167  | 0.1417  |
| g__Schwartzia         | 0.0917  | 0.0583  | 0.0083  | 0.0750  | 0.0083  | 0.0583  | 0.0583  | 0.0750  |
| g__Adlercreutzia      | 0.0167  | 0.0000  | 0.0083  | 0.0000  | 0.0083  | 0.0000  | 0.0000  | 0.0250  |
| g__Desulfohalobium    | 0.0000  | 0.0333  | 0.0083  | 0.0250  | 0.0083  | 0.0000  | 0.0083  | 0.0167  |
| g__Pseudomonas        | 0.0000  | 0.0000  | 0.0083  | 0.0000  | 0.0000  | 0.0000  | 0.0083  | 0.0083  |
| g__Treponema          | 0.0083  | 0.0000  | 0.0083  | 0.0083  | 0.0083  | 0.0083  | 0.0083  | 0.0083  |
| g__PSB-M-3            | 0.0000  | 0.0333  | 0.0083  | 0.0000  | 0.0000  | 0.0000  | 0.0000  | 0.0000  |
| g__Methanosphaera     | 0.0000  | 0.0083  | 0.0083  | 0.0083  | 0.0000  | 0.0000  | 0.0000  | 0.0000  |

---

|                     |        |        |        |        |        |        |        |        |
|---------------------|--------|--------|--------|--------|--------|--------|--------|--------|
| g__Paludibacter     | 0.0000 | 0.0083 | 0.0083 | 0.0000 | 0.0000 | 0.0000 | 0.0000 | 0.0000 |
| g__Leucobacter      | 0.0000 | 0.0000 | 0.0083 | 0.0000 | 0.0000 | 0.0000 | 0.0000 | 0.0000 |
| g__Ruminobacter     | 0.0000 | 0.0000 | 0.0083 | 0.0000 | 0.0000 | 0.0000 | 0.0000 | 0.0000 |
| g__Rhodoferax       | 0.0000 | 0.0000 | 0.0000 | 0.0000 | 0.0000 | 0.0000 | 0.0083 | 0.0833 |
| g__Methylobacterium | 0.0000 | 0.0000 | 0.0000 | 0.0000 | 0.0500 | 0.0000 | 0.0000 | 0.0500 |
| g__Psychromonas     | 0.0000 | 0.0000 | 0.0000 | 0.0000 | 0.0333 | 0.0000 | 0.0000 | 0.0333 |
| g__Anaerofustis     | 0.0000 | 0.0000 | 0.0000 | 0.0083 | 0.0167 | 0.0250 | 0.0167 | 0.0250 |

---

Table s4. Primers used in real-time PCR for the detection of ruminal bacterial species/taxa

| Target taxon and specific strain tested  | Primer set | Primer sequences          |
|------------------------------------------|------------|---------------------------|
| Total bacteria                           | BacteriaR  | CGGCAACGAGCGCAACCC        |
|                                          | BacteriaF  | CCATTGTAGCACGTGTGTAGCC    |
| <i>Butyrivibrio fibrisolvens</i> H17c    | ButFib2F   | ACCGCATAAGCGCACGGA        |
|                                          | ButFib2R   | CGGGTCCATCTTGTACCGATAAAT  |
| <i>Eubacterium ruminantium</i> GA195     | EubRum2F   | CTCCCGAGACTGAGGAAGCTTG    |
|                                          | EubRum2R   | GTCCATCTCACACCACCGGA      |
| <i>Fibrobacter succinogenes</i> S85      | FibSuc3F   | GCGGGTAGCAAACAGGATTAGA    |
|                                          | FibSuc3R   | CCCCGGACACCCAGTAT         |
| <i>Megasphaera elsdenii</i> T81          | MegEls2F   | AGATGGGGACAACAGCTGGA      |
|                                          | MegEls2R   | CGAAAGCTCCGAAGAGCCT       |
| <i>Prevotella brevis</i> B <sub>14</sub> | PreBre1F   | GGTTTCCTTGAGTGTATTCGACGTC |
|                                          | PreBre1R   | CTTTCGCTTGGCCGCTG         |
| <i>Prevotella bryantii</i> GA33          | PreBry2F   | AGCGCAGGCCGTTTGG          |
|                                          | PreBry2R   | GCTTCCTGTGCACTCAAGTCTGAC  |
| <i>Prevotella ruminicola</i> 23          | PreRum1F   | GAAAGTCGGATTAATGCTCTATGTT |
|                                          | PreRum1R   | CATCCTATAGCGGTAAACCTTTGG  |
| <i>Ruminobacter amylophilus</i> H18      | RmbAmy2F   | CTGGGGAGCTGCCTGAATG       |
|                                          | RmbAmy2R   | GCATCTGAATGCGACTGGTTG     |
| <i>Ruminococcus albus</i> 7              | RumAlb3F   | TGTTAACAGAGGGAAGCAAAGCA   |
|                                          | RumAlb3R   | TGCAGCCTACAATCCGAACCTAA   |
| <i>Ruminococcus flavefaciens</i> FD-1    | RumFla3F   | TGGCGGACGGGTGAGTAA        |
|                                          | RumFla3R   | TTACCATCCGTTTCCAGAAGCT    |
| <i>Selenomonas ruminantium</i> D         | SelRum2F   | CAATAAGCATTCCGCCTGGG      |
|                                          | SelRum2R   | TTCACTCAATGTCAAGCCCTGG    |
| <i>Streptococcus bovis</i> JB1           | StrBov2F   | TTCTAGAGATAGGAAGTTTCTTCGG |
|                                          | StrBov2R   | ATGATGGCAACTAACAATAGGGGT  |
| <i>Succinivibrio dextrinosolvens</i> 22b | SucDex1F   | CGTCAGCTCGTGTCTGTGAGA     |
|                                          | SucDex1R   | CCCGCTGGCAACAAAGG         |
